# Supplementary material for: Evaluating Desk-Assisted Standing Techniques for Simulated Pregnant Conditions: An Experimental Study Using a Maternity-Simulation Jacket
Source: MDPI journal article supplement (doi:10.3390/healthcare12090931), 2024-05-01
Supplement: s1 [file s1]

## Supplement “Evaluating Desk-Assisted Standing Techniques for Simulated Pregnant Conditions: An Experimental Study Using a Maternity-Simulation Jacket”

To supplement the manuscript, we present the results not only in graphs but also in tables.

### 1. Comparison of muscle load during STS using EMG analysis

In figure 4, we compare left and right EMG. Table S1 and Table S2 show the details.

**Table S1.** iEMG of left and right lower back.

| conditions                  | Mean   | SD     |
|-----------------------------|--------|--------|
| <b>both-hands-on-knees</b>  |        |        |
| left                        | 485.07 | 176.81 |
| right                       | 440.39 | 230.48 |
| <b>one-hand-on-knees</b>    |        |        |
| left                        | 453.62 | 232.12 |
| right                       | 525.60 | 267.41 |
| <b>both-hands-on-tables</b> |        |        |
| left                        | 545.25 | 222.08 |
| right                       | 482.97 | 238.46 |

**Table S2.** maximum EMG of left and right lower back.

| conditions                  | Mean  | SD    |
|-----------------------------|-------|-------|
| <b>both-hands-on-knees</b>  |       |       |
| left                        | 43.58 | 13.95 |
| right                       | 37.62 | 18.77 |
| <b>one-hand-on-knees</b>    |       |       |
| left                        | 47.25 | 22.36 |
| right                       | 48.89 | 23.99 |
| <b>both-hands-on-tables</b> |       |       |
| left                        | 42.83 | 18.29 |
| right                       | 33.61 | 18.23 |

## 2. Comparison of trunk flexion angle during STS

In figure 5b, we compare the maximum flexion angle. Table S3 shows the details.

**Table S3.** maximum trunk flexion angles.

| conditions           | Mean  | SD   |
|----------------------|-------|------|
| both-hands-on-knees  | 33.00 | 4.85 |
| one-hand-on-knees    | 25.87 | 8.65 |
| both-hands-on-tables | 34.58 | 3.76 |

## 3. Reproducing the pregnant state

In figure 6, we compare the results wearing the jacket and not wearing the jacket. Table S4, S5, S6, and S7 provide the details.

**Table S4.** iEMG wearing the jacket and not wearing the jacket.

| conditions                  | Mean   | SD     |
|-----------------------------|--------|--------|
| <b>both-hands-on-knees</b>  |        |        |
| wearing the jacket          | 462.73 | 204.70 |
| not wearing the jacket      | 295.70 | 144.64 |
| <b>one-hand-on-knees</b>    |        |        |
| wearing the jacket          | 489.61 | 250.66 |
| not wearing the jacket      | 328.82 | 229.06 |
| <b>both-hands-on-tables</b> |        |        |
| wearing the jacket          | 514.11 | 229.29 |
| not wearing the jacket      | 371.77 | 192.66 |

**Table S5.** Maximum EMG wearing the jacket and not wearing the jacket.

| conditions                  | Mean  | SD    |
|-----------------------------|-------|-------|
| <b>both-hands-on-knees</b>  |       |       |
| wearing the jacket          | 40.60 | 16.65 |
| not wearing the jacket      | 33.24 | 13.14 |
| <b>one-hand-on-knees</b>    |       |       |
| wearing the jacket          | 48.07 | 22.99 |
| not wearing the jacket      | 32.32 | 19.43 |
| <b>both-hands-on-tables</b> |       |       |
| wearing the jacket          | 38.22 | 18.59 |
| not wearing the jacket      | 32.06 | 13.81 |

**Table S6.** Y-axis mean of COP wearing the jacket and not wearing the jacket.

| conditions                  | Mean   | SD    |
|-----------------------------|--------|-------|
| <b>both-hands-on-knees</b>  |        |       |
| wearing the jacket          | -59.80 | 15.14 |
| not wearing the jacket      | -42.12 | 20.14 |
| <b>one-hand-on-knees</b>    |        |       |
| wearing the jacket          | -56.14 | 11.45 |
| not wearing the jacket      | -37.64 | 22.25 |
| <b>both-hands-on-tables</b> |        |       |
| wearing the jacket          | -52.79 | 22.28 |
| not wearing the jacket      | -35.80 | 19.96 |

**Table S7.** maximum trunk flexion angles wearing the jacket and not wearing the jacket.

| conditions                  | Mean  | SD   |
|-----------------------------|-------|------|
| <b>both-hands-on-knees</b>  |       |      |
| wearing the jacket          | 33.00 | 4.85 |
| not wearing the jacket      | 35.54 | 6.52 |
| <b>one-hand-on-knees</b>    |       |      |
| wearing the jacket          | 25.87 | 8.65 |
| not wearing the jacket      | 29.35 | 8.86 |
| <b>both-hands-on-tables</b> |       |      |
| wearing the jacket          | 34.58 | 3.76 |
| not wearing the jacket      | 34.43 | 6.43 |
